# Supplementary material for: Prediction of disease-associated mutations in the transmembrane regions of proteins with known 3D structure
Source: PLoS One. 2019 Jul 10;14(7):e0219452. doi: 10.1371/journal.pone.0219452 (PMC6620012; doi:10.1371/journal.pone.0219452)
Supplement: S2 Table — (XLSX) [file pone.0219452.s003.xlsx]

## Sheet: Лист 1 - BorodaTM features
BorodaTM features
Feature	Type
slim substitution score	sequence-based
contact strength (mutant-type)	structure-based
total energy (mutant-type neighbourhood)	energy-based
packing density (mutant-type)	structure-based
contact area (wild-type)	structure-based
solvation energy (mutant-type)	energy-based
side chain volume (wild-type)	sequence-based
electrostatic energy (wild-type)	energy-based
contact area (mutant-type)	structure-based
total energy (wild-type neighbourhood)	energy-based
blosum substitution score	sequence-based
entropic energy (wild-type neighbourhood)	energy-based
isoelectric point (mutant-type)	sequence-based
composition in membrane (mutant-type)	sequence-based
packing density (wild-type)	structure-based
solvation energy (wild-type neighbourhood)	energy-based
Van der Waals energy (wild-type)	energy-based
electrostatic energy (wild-type neighbourhood)	energy-based
RASA (wild-type)	structure-based
hydrogen-bond energy (mutant-type neighbourhood)	energy-based
number of special contacts (mutant-type)	structure-based
entropic energy (mutant-type)	energy-based
hydrophobicity scale (mutant-type)	sequence-based
stability contribution (mutant-type)	sequence-based
RASA (mutant-type)	structure-based
number of hydrogen bonds (mutant-type)	structure-based
ASA (mutant-type)	structure-based
Van der Waals energy (wild-type neighbourhood)	energy-based
number of aromatic contacts (wild-type)	structure-based
polarity (mutant type)	sequence-based
number of aliphatic contacts (wild-type)	structure-based
Van der Waals energy (mutant-type)	energy-based
Van der Waals energy (mutant-type neighbourhood)	energy-based
total energy (wild-type)	energy-based
electrostatic energy (mutant-type neighbourhood)	energy-based
number of aliphatic contacts (mutant-type)	structure-based
side chain volume (mutant-type)	sequence-based
isoelectric point (wild-type)	sequence-based
entropic energy (wild-type)	energy-based
number of charged contacts (wild-type)	structure-based
number of polar contacts (wild-type)	structure-based
